# Supplementary material for: A CRISPR platform for targeted in vivo screens identifies Toxoplasma gondii virulence factors in mice
Source: PubMed Central journal article supplement (PMC6722137; doi:10.1038/s41467-019-11855-w), 2019-09-03
Supplement: 41467_2019_11855_MOESM1_ESM.pdf [file 41467_2019_11855_MOESM1_ESM.pdf]

## Supplementary Information

A CRISPR platform for targeted *in vivo* screens identifies *Toxoplasma gondii* virulence factors in mice

Young *et al*

## Supplementary Figure 1

a.

gRNA were designed using ECRISP and 3-5 selected per gene based on the following criteria

1. Minimal off target effects (including plasmid sequence) (already in ECRISP)
2. Minimal overlap between guides (already in ECRISP)
3. Poly T (already in ECRISP)
4. No KpnI site in sequence (as this is used to linearize plasmid prior to transfection)
5. Location:
  - a. Avoid first 100 bp of gene
  - b. No later than 50% of cds
  - c. Not in UTRs
6. Intermediate GC content (between 40 and 80%).
7. Either G at -4 (from PAM) ; G/A at -2 (from PAM) ; G/A at -1 (from PAM)
8. Target non-template strand (for usage in CRISPRi screens)

b.

| Number of criteria met     | Number of genes with |        |        |
|----------------------------|----------------------|--------|--------|
|                            | 5 gRNA               | 4 gRNA | 3 gRNA |
| 8                          | 5879                 |        |        |
| 7                          | 625                  |        |        |
| 6                          | 53                   |        |        |
| 5                          | 107                  |        |        |
| 5 - 4 bp overlap           | 130                  |        |        |
| 5 - 60% gene, 4 bp overlap | 389                  | 211    | 222    |

**Supplementary Figure 1. Design of gRNAs. (a)** List of criteria used for gRNA design and selection. Where this did not give >3 gRNA, criteria were dropped (from 8 downwards) and the stringency was relaxed allowing up to the first 60% of the coding sequence and 4 bp overlap between gRNAs. **(b)** Number of genes with gRNA designed showing the number of gRNA/gene and the number of criteria met.

## Supplementary Figure 2

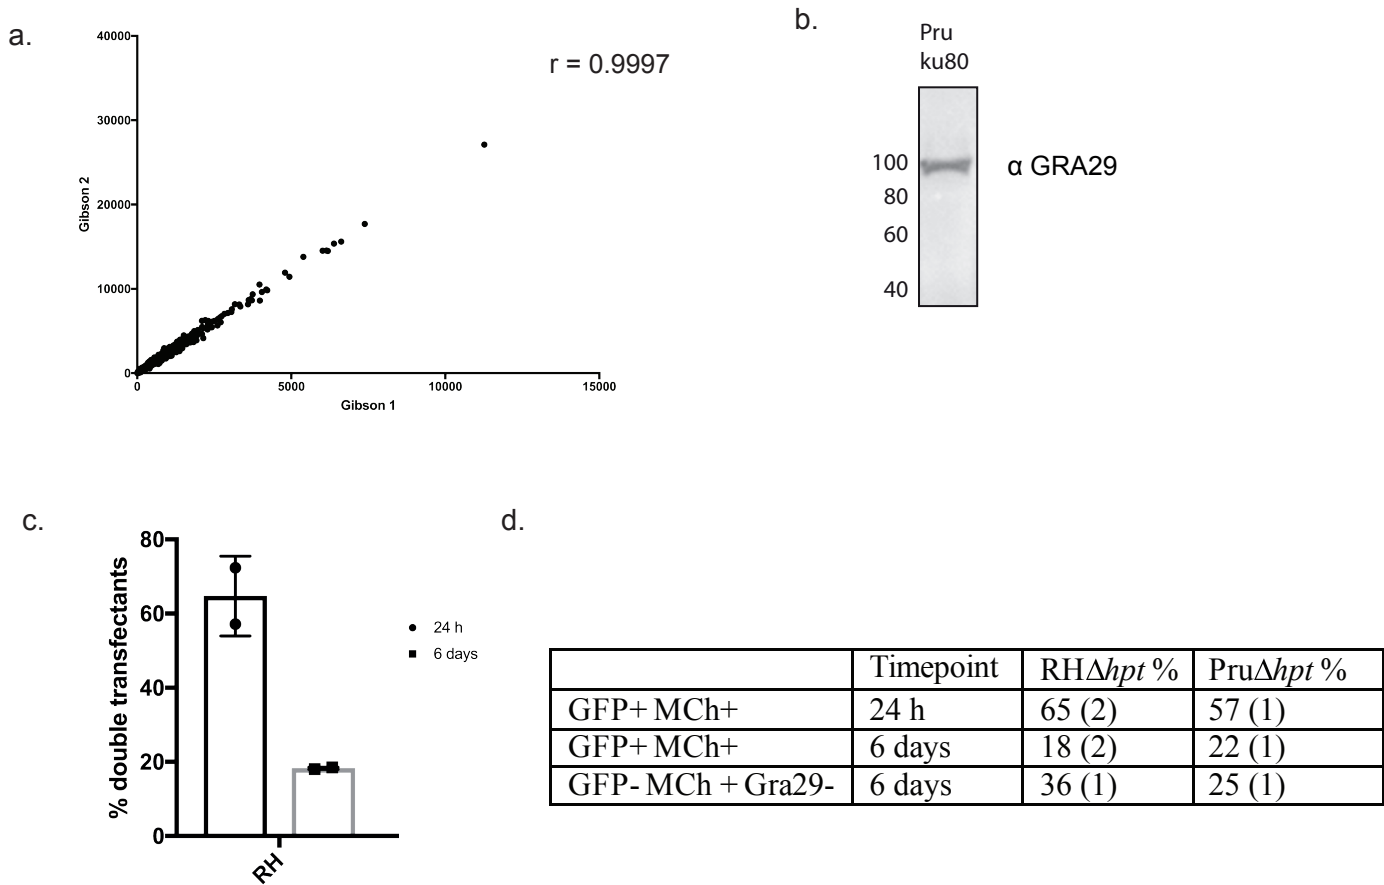

**Supplementary Figure 2. Testing of cloning reproducibility of gRNAs and double transfection frequency (a)** Gibson cloning of vector pools is highly reproducible. Correlation plot with Pearson correlation coefficient  $r$ , of sequencing reads from two independent cloning reactions of the 800 gRNA library. **(b,c)** Parasites take up multiple plasmids in mixed transfections. RH $\Delta$ *hxgprt* and Pru $\Delta$ *hxgprt* were co-transfected with pCAS9(GFP)-T2A-HXGPRT targeting *GRA29* and pCAS9(mCherry)-T2A-HXGPRT targeting *UPRT* and the proportion of parasites expressing both fluorophores at 24h and after 6 days M/X selection were counted. **(b)** The mean is shown with SD error bars shown.  $n = 2$  biologically independent experiments. **(c)** Immunoblot showing a band of the expected size when *T. gondii* lysate was probed with the  $\alpha$ -GRA29 antibody. **(d)** Table showing the percentage of parasites expressing both fluorophores and the percentage expressing mCherry only that were lacking staining for GRA29. Number of experiments shown in brackets.

### Supplementary Figure 3

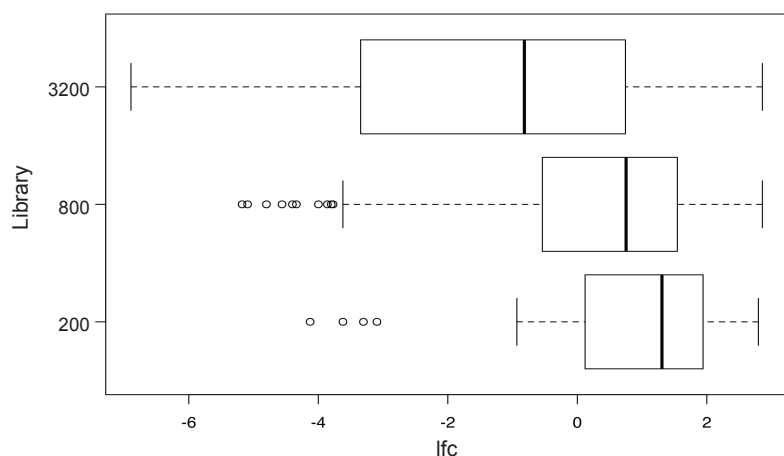

**Supplementary Figure 3. The 3200 gRNA library targets a higher proportion of essential genes.** Boxplots showing the median phenotype scores assigned by Sidik *et al* for the genes targeted in the 200, 800 and 3200 gRNA libraries <sup>1</sup>. Median and first quartiles are shown by the box, and 1.5x interquartile range indicated by whiskers. Outliers are shown as circles.

## Supplementary Figure 4

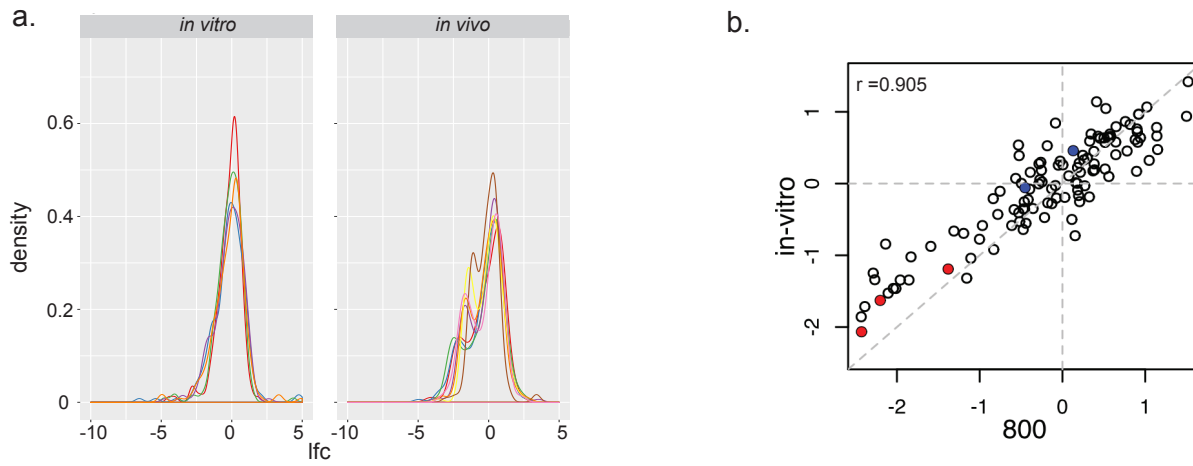

### Supplementary Figure 4. Reproducible phenotype score distribution *in vitro* and *in vivo*.

**(a)** Overlay of lfc for each replicate following DESeq2 normalisation for *in vitro* (n=5 technical replicates) and *in vivo* (n=8 mice) analysis. **(b)** Correlation plot with Pearson's correlation coefficient  $r$ , of gene lfc compared to the 800 gRNA library showing high reproducibility between experiments. Source data in Supplementary Data files 2 & 3.

## Supplementary Figure 5

a.

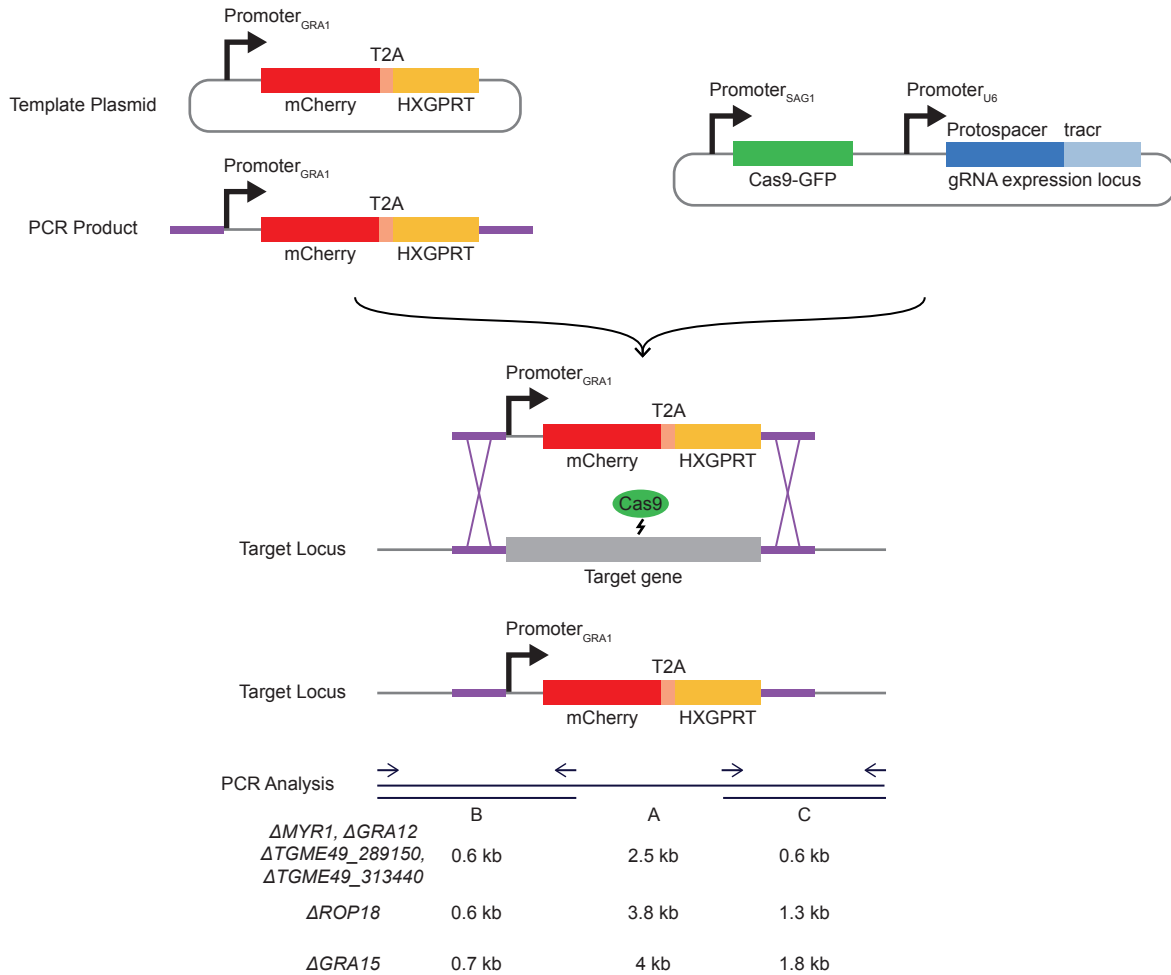

b.

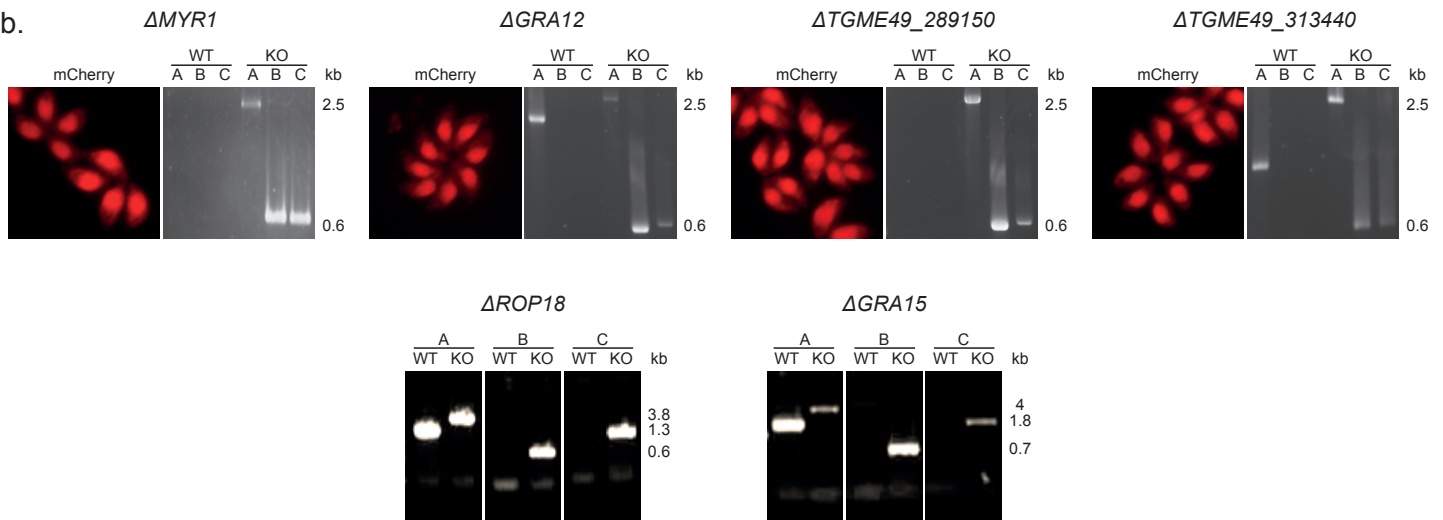

**Supplementary Figure 5. Generation of gene knockouts (a)** Schematic of the gene knockout strategy. mCherry flanked by GRA1 promoter and GRA2 3' UTR was amplified with primers adding homology to gene of interest. A double strand break was introduced by Cas9 to promote integration of mCherry and disruption of the locus **(b)** PCRs verifying correct integration of mCherry into *MYR1*, *GRA12*, *TGME49\_289150*, *TGME49\_313440*, *ROP18* and *GRA15* loci. A, B, C refer to amplicons indicated in **(a)**.

## Supplementary Figure 6

a.

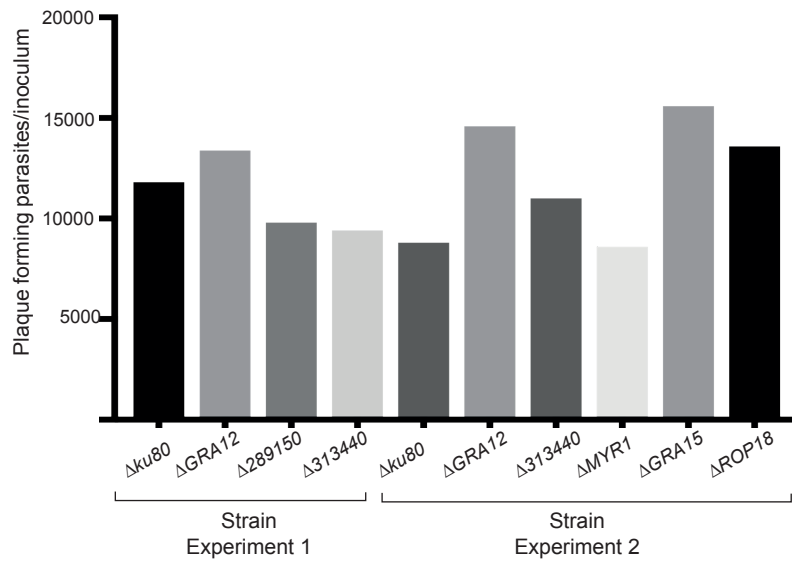

b.

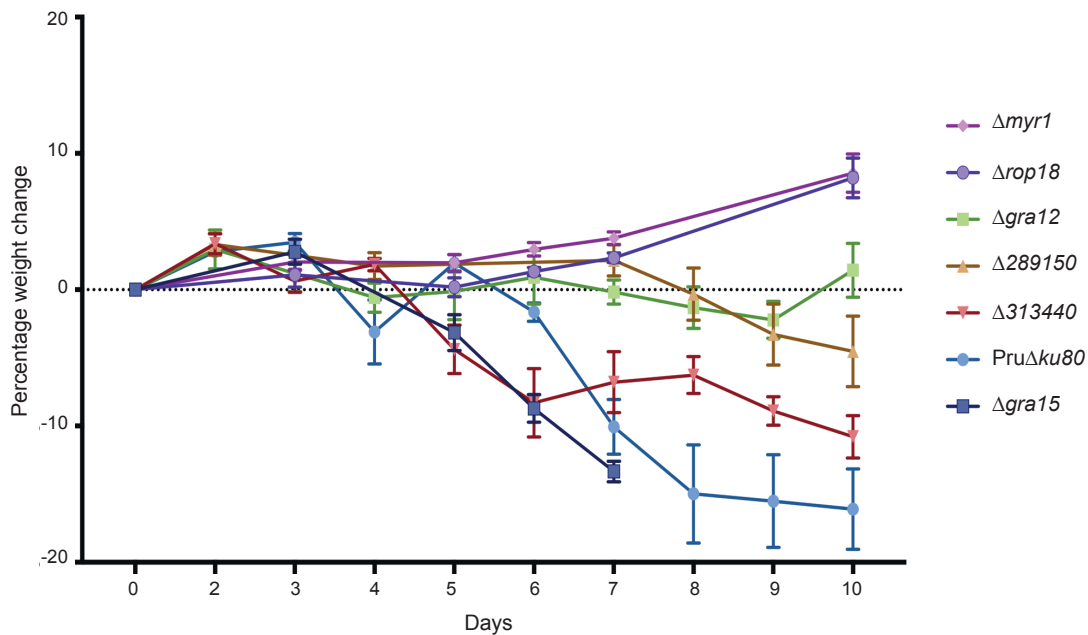

**Supplementary Figure 6. *In vivo* phenotypes of single knock out mutants.** Mouse inoculum and weight loss during infection. C57BL/6 mice were infected i.p. with 50,000 tachyzoites of the parental line *Pruku80* (two experiments; n = 10 mice) and  $\Delta GRA12$  (two experiments; n = 10 mice),  $\Delta TGME49\_289150$  (one experiments; n = 5 mice),  $\Delta TGME49\_313400$  (two experiments; n = 10 mice), and control strains  $\Delta GRA15$  (one experiments; n = 5 mice),  $\Delta ROP18$  (one experiments; n = 5 mice) and  $\Delta MYR1$  (one experiments; n = 5 mice). **(a)** Plaque forming parasites per mouse inoculum as calculated from the plaques formed from 10ul of a 1:10 dilution of the inoculum. **(b)** Mouse weight was monitored over the course of infection. Mean weight loss shown per group with error bars denoting SD.

## Supplementary Reference

1. Sidik, S. M. *et al.* A Genome-wide CRISPR Screen in *Toxoplasma* Identifies Essential Apicomplexan Genes. *Cell* **166**, 1423-1435.e12 (2016).



**Supplementary Table 1.** Oligonucleotides used in this study. For the Illumina sequencing primers the barcode is shown in blue and spacers in red.

| Number | Name                         | Oligonucleotide sequence                                                                                  |
|--------|------------------------------|-----------------------------------------------------------------------------------------------------------|
| 1      | hxprrt (2A hr) F             | catgtggagatgtagaagaaaatccaggaccaccgggatggcgtccaaaccattgaag                                                |
| 2      | hxprrt (pCas9) R             | ttgtcgaattgagaagtgagcacaacgggtgagaattcttacttctcgaacttttgcg                                                |
| 3      | PacI-NcoI gRNA F             | tttaataacgactcgaccatgggttttagagctagaatagc                                                                 |
| 4      | pSAG1::cas9UG R              | aacttgacatccccattfac                                                                                      |
| 5      | gRNA GRA29 F                 | ttgaaacgagcaatgaaccagtttttagagctagaatagc                                                                  |
| 6      | TracrRNA opt F_univ          | cagcatagcaagtttaataaggctagtc                                                                              |
| 7      | TracrRNA opt NcoI PacI R     | ttccagcatagctcttaaacctaggtcgagtcg                                                                         |
| 8      | TracrRNA opt UPRT R          | ttccagcatagctcttaaacgctctcacaatcgagacg                                                                    |
| 9      | TracrRNA opt GRA29 R         | ttccagcatagctcttaaacggttcattgctcg                                                                         |
| 10     | pCAS9-T2A-HXGPRT CAS9 F      | tgatcatcaagctgcctaagtactc                                                                                 |
| 11     | pCAS9-T2A-HXGPRT 1481R       | taatcctgttaccagtgctgc                                                                                     |
| 12     | MiSeq F1                     | aatgatacggcaccaccgagatctacactcttccctacacgacgctctccgatct <b>aa</b> gtagagtcacctgctcccgaagg                 |
| 13     | MiSeq F1 suggested           | aatgatacggcaccaccgagatctacact <b>gaacctt</b> acactcttccctacacgacgctctccgatctt <b>ca</b> acctgctcccgaagg   |
| 14     | MiSeq R1                     | caagcagaagacggcatacagagat <b>aa</b> gtagagtgactggagttcagacgtgtgctctccgatct <b>ta</b> gtcagtgagcgaggaagc   |
| 15     | MiSeq R2                     | caagcagaagacggcatacagagat <b>acacgatc</b> gtgactggagttcagacgtgtgctctccgatct <b>ta</b> gtcagtgagcgaggaagc  |
| 16     | MiSeq R3                     | caagcagaagacggcatacagagat <b>cgcgcg</b> gtgactggagttcagacgtgtgctctccgatct <b>ga</b> gtcagtgagcgaggaagc    |
| 17     | MiSeq R4                     | caagcagaagacggcatacagagat <b>catgatcg</b> gtgactggagttcagacgtgtgctctccgatct <b>cg</b> atcagtgagcgaggaagc  |
| 18     | MiSeq R5                     | caagcagaagacggcatacagagat <b>cgftacca</b> gtgactggagttcagacgtgtgctctccgatct <b>cg</b> atcagtgagcgaggaagc  |
| 19     | MiSeq R6                     | caagcagaagacggcatacagagat <b>tccttgg</b> gtgactggagttcagacgtgtgctctccgatct <b>ta</b> gtcagtgagcgaggaagc   |
| 20     | MiSeq R7                     | caagcagaagacggcatacagagat <b>aacgcatt</b> gtgactggagttcagacgtgtgctctccgatct <b>ta</b> gtcagtgagcgaggaagc  |
| 21     | MiSeq R8                     | caagcagaagacggcatacagagat <b>acagtat</b> gtgactggagttcagacgtgtgctctccgatct <b>ga</b> gtcagtgagcgaggaagc   |
| 22     | MiSeq R9                     | caagcagaagacggcatacagagat <b>aggttaagg</b> gtgactggagttcagacgtgtgctctccgatct <b>cg</b> atcagtgagcgaggaagc |
| 23     | MiSeq R10                    | caagcagaagacggcatacagagat <b>aacaatg</b> gtgactggagttcagacgtgtgctctccgatct <b>cg</b> atcagtgagcgaggaagc   |
| 24     | MiSeq R11                    | caagcagaagacggcatacagagat <b>actgtatc</b> gtgactggagttcagacgtgtgctctccgatct <b>ta</b> gtcagtgagcgaggaagc  |
| 25     | MiSeq R12                    | caagcagaagacggcatacagagat <b>aggtcga</b> gtgactggagttcagacgtgtgctctccgatct <b>ta</b> gtcagtgagcgaggaagc   |
| 26     | pCAS9 GFP removal F          | ggatccggagaaggaagagg                                                                                      |
| 27     | pCAS9 GFP removal R          | ggatccgctgctgccgtt                                                                                        |
| 28     | pCAS9 mCh insertion F        | gcaacggcagcagcggatcctccaaggcggaagaggac                                                                    |
| 29     | pCAS9 mCh insertion R        | cctctccttccggatcctgtacagctcgtccattc                                                                       |
| 30     | pET28a GRA29 25F             | cagcggcctggtccgcgaggcagccatatgagccgctgaccgtgcgag                                                          |
| 31     | pET28a GRA29 R               | ggtggtggtgctcagtgccggccaagcttcaacgtgtccctctccc                                                            |
| 32     | gRNA TGME49_288650 (GRA12) F | gggtatttcgatcgttgggttttagagctagaatagc                                                                     |
| 33     | gRNA TGME49_289150 F         | ggacacgcagcctccgagaggttttagagctagaatagc                                                                   |

**Supplementary Table 1 continued**

|    |                              |                                                             |
|----|------------------------------|-------------------------------------------------------------|
| 34 | gRNA TGME49_313440 F         | gcgacgggataaggtacgtggttttagagctagaaatagc                    |
| 35 | gRNA TGME49_254470 (MYR1) F  | gggacaacacgcctctacgggttttagagctagaaatagc                    |
| 36 | gRNA TGME49_005250 ROP18 F   | ggcgacatgcaagaacaagtttagagctagaaatagc                       |
| 37 | gRNA TGME49_075470 Gra15 F   | aagcgacttctaaacacgtggttttagagctagaaatagc                    |
| 38 | TGME49_288650 Homology mCH F | atttctactggataaggtgatatccgcaatctgtacacgtcgaaggctgtagtactgg  |
| 39 | TGME49_288650 Homology mCH R | gagctgacgaaggcgtaagtaagatactcaaaggcgcgtgtcgaactacgggtg      |
| 40 | TGME49_289150 Homology mCH F | acgtgagtcacggcgttttccgctgtgcttttaccgatcgaaggctgtagtactgg    |
| 41 | TGME49_289150 Homology mCH R | gcttctttcctgtgcaccttcggtcatttttccaccctgcgactggaactacgggtg   |
| 42 | TGME49_313440 Homology mCH F | tttgtctgtgcagtcgattcgaatfaattcgtggttcgaaggctgtagtactgg      |
| 43 | TGME49_313440 Homology mCH R | gctagacgattagggaaagcgttctgogatcgactcagatgtcgaactacgggtg     |
| 44 | TGME49_254470 Homology mCH F | atccgacgagtcactgaatccggaacaagaaatcagtgatcgaaggctgtagtactgg  |
| 45 | TGME49_254470 Homology mCH R | aaagttgtcgggatttcccctggcaccgttctctgttctgtcgaactacgggtg      |
| 46 | TGME49_205250 Homology mCH F | atccagctgtcactatttctagcgttgaggctcccgaaggctgtagtactgg        |
| 47 | TGME49_205250 Homology mCH R | acagcctgtcttgcgggttaaatgtagcgttcttctctgactggaactacgggtg     |
| 48 | TGME49_275470 Homology mCH F | cccgtgcccggcagtggtgccatctcgaactgtctagtcgaactacgggtg         |
| 49 | TGME49_275470 Homology mCH R | agtccccacggaagttttaggacgttccgggtggcgaggatcgaaggctgtagtactgg |
| 50 | mCH Insert Analysis F        | acgacttcaacgagatgtcc                                        |
| 51 | mCH Insert Analysis R        | gtgtcgaacaagctgacac                                         |
| 52 | TGME49_288650 Analysis F     | cccgtttattcgaactcatg                                        |
| 53 | TGME49_288650 Analysis R     | acgcacgaaaacaaaacgg                                         |
| 54 | TGME49_289150 Analysis F     | gcagttacttccagatcgtc                                        |
| 55 | TGME49_289150 Analysis R     | tctcttctctcgaatgtcg                                         |
| 56 | TGME49_313440 Analysis F     | ccagttgtagctccgtttc                                         |
| 57 | TGME49_313440 Analysis R     | gttccgaacgttgaatgg                                          |
| 58 | TGME49_254470 Analysis F     | tgtagcggcgacggatg                                           |
| 59 | TGME49_254470 Analysis R     | aaactggactaggcgtctc                                         |
| 60 | TGME49_275470 Analysis F     | taagccgggtgtcattgtc                                         |
| 61 | TGME49_275470 Analysis R     | ccccctcagctgtttgaa                                          |
| 62 | TGME49_205250 Analysis F     | gcttacggcgtctcatacca                                        |
| 63 | TGME49_205250 Analysis R     | aacgagatgtccgcgactt                                         |
