# Supplementary material for: A CRISPR platform for targeted in vivo screens identifies Toxoplasma gondii virulence factors in mice
Source: PubMed Central journal article supplement (PMC6722137; doi:10.1038/s41467-019-11855-w), 2019-09-03
Supplement: 41467_2019_11855_MOESM3_ESM.pdf [file 41467_2019_11855_MOESM3_ESM.pdf]

## Description of Additional Supplementary Files

File Name: Supplementary Data 1

Description: **ME49 gRNA list**. All gRNAs designed against the ME49 genome and BLAST analysis hits against the GT1 genome; Related to Figure 1.

File Name: Supplementary Data 2

Description: **CRISPR\_200\_800\_3200 libraries**. Raw and normalised 200, 800, 3200 gRNA sequencing counts, thresholded gene lfcs, and phenotype scores; Related to Figure 2

File Name: Supplementary Data 3

Description: **CRISPR\_in vitro\_in vivo**. Raw and normalized gRNA sequencing counts and lfcs, thresholded gene lfcs, phenotype and DISCO scores - in vivo experiment; Related to Figure 3
